# Supplementary material for: Gait variability following abrupt removal of external stabilization decreases with practice in incomplete spinal cord injury but increases in non-impaired individuals
Source: Springer Nature journal article supplement (doi:10.1186/s12984-018-0475-7), 2019-01-07

• Raw data  
-- Exponential fit

a) Example average participant with iSCI

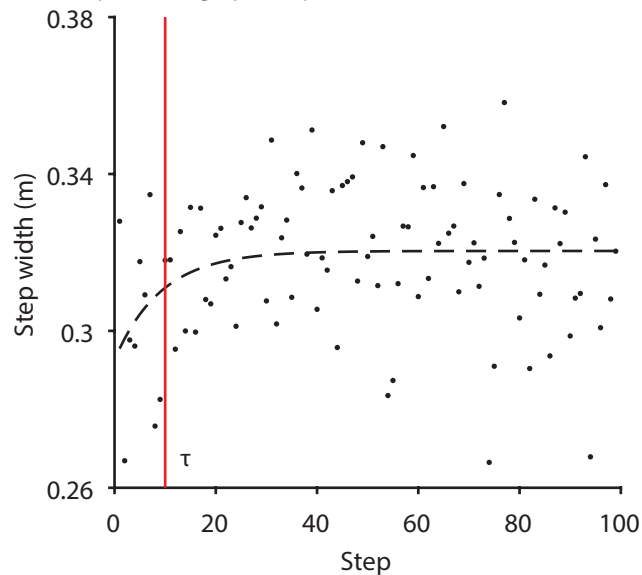

b) Example average non-impaired participant

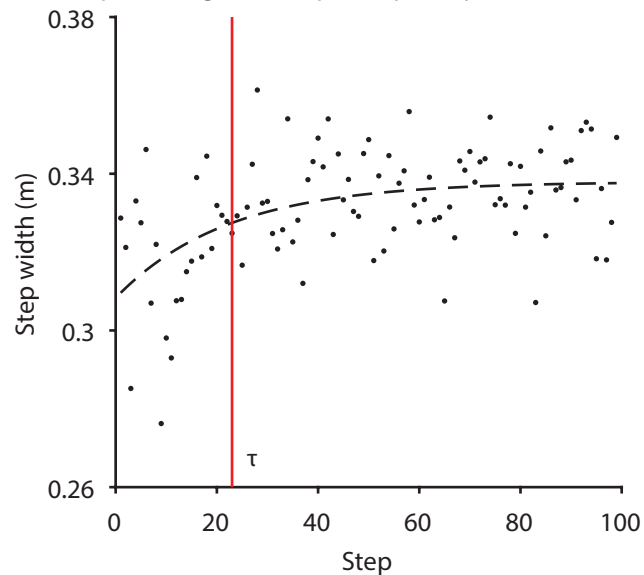

c) Group data

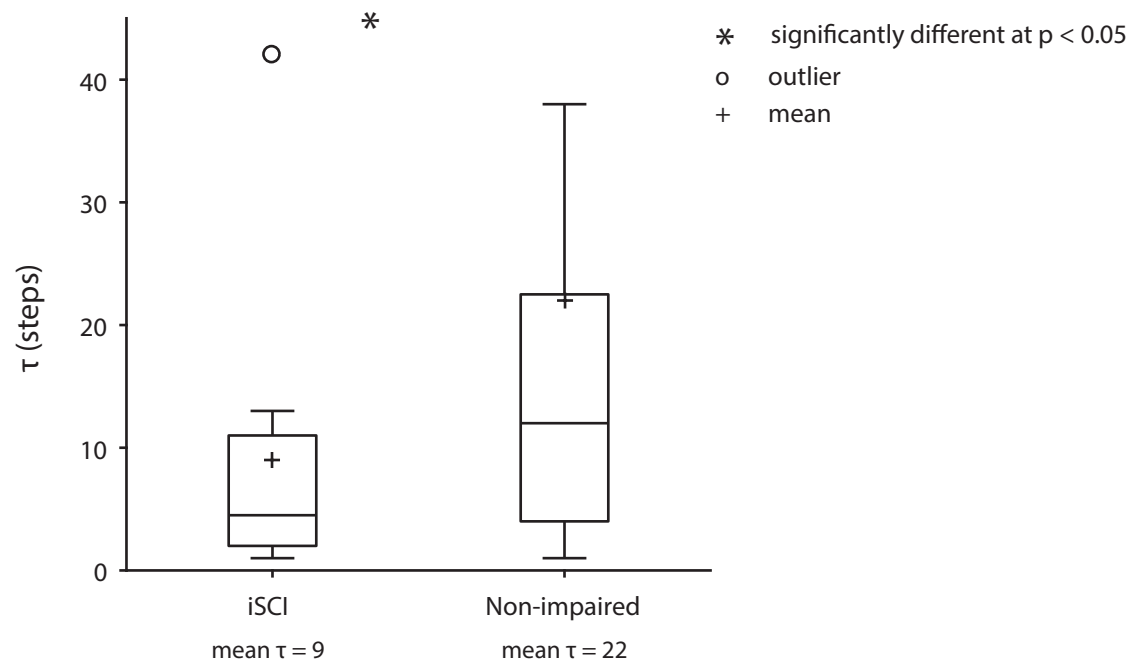

Supplement: MOESM1 [file 16382194]
