# Supplementary material for: Gait variability following abrupt removal of external stabilization decreases with practice in incomplete spinal cord injury but increases in non-impaired individuals
Source: Springer Nature journal article supplement (doi:10.1186/s12984-018-0475-7), 2019-01-07

× iSCI

○ Non-impaired

— Linear fit all subjects

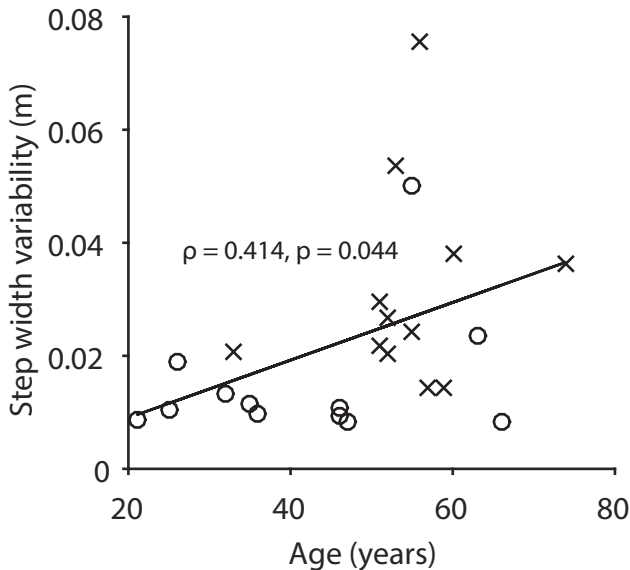

Supplement: MOESM5 [file 16382194]
