# Supplementary material for: Gait variability following abrupt removal of external stabilization decreases with practice in incomplete spinal cord injury but increases in non-impaired individuals
Source: J Neuroeng Rehabil. 2019 Jan 7;16:4. doi: 10.1186/s12984-018-0475-7 (PMC6322313; doi:10.1186/s12984-018-0475-7)
Supplement: Supplementary file 3 — Table of demographic and clinical outcome measures for participants with iSCI. (XLSX 12 kb) [file 12984_2018_475_MOESM2_ESM.xlsx]

## Sheet: Clinical outcome measures
Additional file 2: Demographic and xlinical outcome measures for individuals with iSCI
	Age (yrs)	Height (m)	Weight (kg)	Gender	AIS	TUG (s)	TMWT (s)	LEMS	WISCI II	BBS
	52.7644	1.9	95.2544	M	D	16.47	5.36	35	20	45
	54.4822	1.8	79.3787	M	D	16.94	4.64	48	20	47
	75.4712	1.6	60.3278	M	D	9.56	4.02	47	20	55
	55.6082	1.7	92.9864	M	D	21.34	8.66	42	20	39
	34.3315	1.7	77.1107	M	D	8.09	3.61	45	20	56
	57.9151	1.7	53.0703	F	D	11.88	5.74	42	20	53
	51.8329	1.7	83.9146	M	D	8.87	3.59	45	20	55
	56.9753	1.7	48.5344	F	D	14.1	6.17	43	20	47
	52.6822	1.8	84.3682	M	D	9.8	4.07	49	20	55
	52.4877	1.7	56.699	M	D	6.39	3.17	50	20	56
	61.1178	1.8	95.708	M	D	14.34	5.82	47	20	49
	60.4767	1.7	67.1317	M	D	8.91	3.78	47	20	55
Mean	55.5121	1.73333	74.5403			12.2242	4.88583	45		51
Stdev	9.29459	0.0778499	16.9071			4.44988	1.5571	4.0899		5.51032
AIS = American Spinal Injury Association Impairment Scale
TUG = Timed Up and Go time in seconds
TMWT = Ten Meter Walk Test time (fast speed) in seconds
LEMS = lower extremity motor score
WISCI II = Walking Index for Spinal Cord Injury II
BBS = Berg Balance Scale
