# Supplementary material for: Gait variability following abrupt removal of external stabilization decreases with practice in incomplete spinal cord injury but increases in non-impaired individuals
Source: J Neuroeng Rehabil. 2019 Jan 7;16:4. doi: 10.1186/s12984-018-0475-7 (PMC6322313; doi:10.1186/s12984-018-0475-7)
Supplement: Supplementary file 4 — Table of statistical analysis results for the last 100 steps in the null or stabilizing force field prior to the transition for both participant groups. (XLSX 14 kb) [file 12984_2018_475_MOESM3_ESM.xlsx]

## Sheet: Sheet1
Additional file 3: Statistical analysis for period In the Field
	Repeated Measures ANOVA				Friedman test
Metric	GG p	p-value	Sig pairs*	p-value	Χ2	p-value	Significant pairs	p-value
iSCI
COM speed mean		<0.0005	N1 > T1	0.005
			N1 > T2	<0.0005
			N1 > T3	<0.0005
			T1 < N2	0.012
			T2 < N2	<0.0005
			T3 < N2	0.001
COM speed variability					27.267	<0.0005	N1 > T1	0.045
							N1 > T2	0.012
							N1 > T3	0.03
							T1 < N2	0.005
							T2 < N2	0.001
							T3 < N2	0.003
COM excursion mean		<0.0005	N1 > T1	<0.0005
			N1 > T2	0.001
			N1 > T3	0.001
			T1 < N2	<0.0005
			T2 < N2	<0.0005
			T3 < N2	<0.0005
COM excursion variability		<0.0005	N1 > T1	0.001
			N1 > T2	0.001
			N1 > T3	0.001
			T1 < N2	0.001
			T2 < N2	0.001
			T3 < N2	0.001
Step width mean	0.065
Step width variability		0.647
Hip abductor activity		0.022	none
Non-impaired
COM speed mean	<0.0005		N1 > T1	<0.0005
			N1 > T2	<0.0005
			N1 > T3	<0.0005
			T1 < T3	0.003
			T1 < N2	<0.0005
			T2 < N2	<0.0005
			T3 < N2	<0.0005
COM speed variability	0.001		N1 > T3	0.025
			T2 < N2	0.006
			T3 < N2	0.007
COM excursion mean		<0.0005	N1 > T1	<0.0005
			N1 > T2	<0.0005
			N1 > T3	<0.0005
			T1 < N2	<0.0005
			T2 < N2	<0.0005
			T3 < N2	<0.0005
COM excursion variability		<0.0005	N1 > T1	<0.0005
			N1 > T2	<0.0005
			N1 > T3	<0.0005
			T1 < N2	0.001
			T2 < N2	<0.0005
			T3 < N2	<0.0005
Step width mean	0.003		N1 > T1	0.001
Step width variability		0.383
Hip abductor activity		<0.0005	N1 > T3	0.036
Greenhouse-Geisser (GG) correction was used when sphericity assumption was violated. Friedman's nonparametric tests were used when normality assumptions were violated. Significant effects shown in bold. N1-2 : Null 1 and 2 trials; T1-3: Transition 1-3 trials.
